# Supplementary material
Source: PubMed Central journal article supplement (PMC3970525)
Supplement: 1324161111_pnas.201324161SI.pdf [file 1324161111_pnas.201324161SI.pdf]

# Supporting Information

Ziemert et al. 10.1073/pnas.1324161111

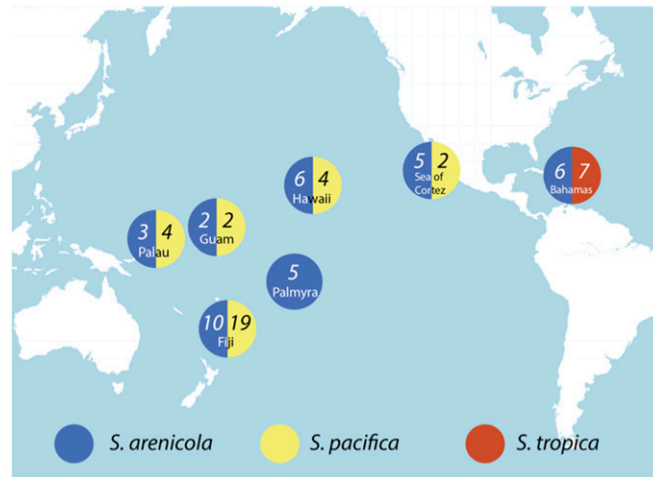

Fig. S1. Geographic origin and numbers of *Salinispora* strains used in this study.

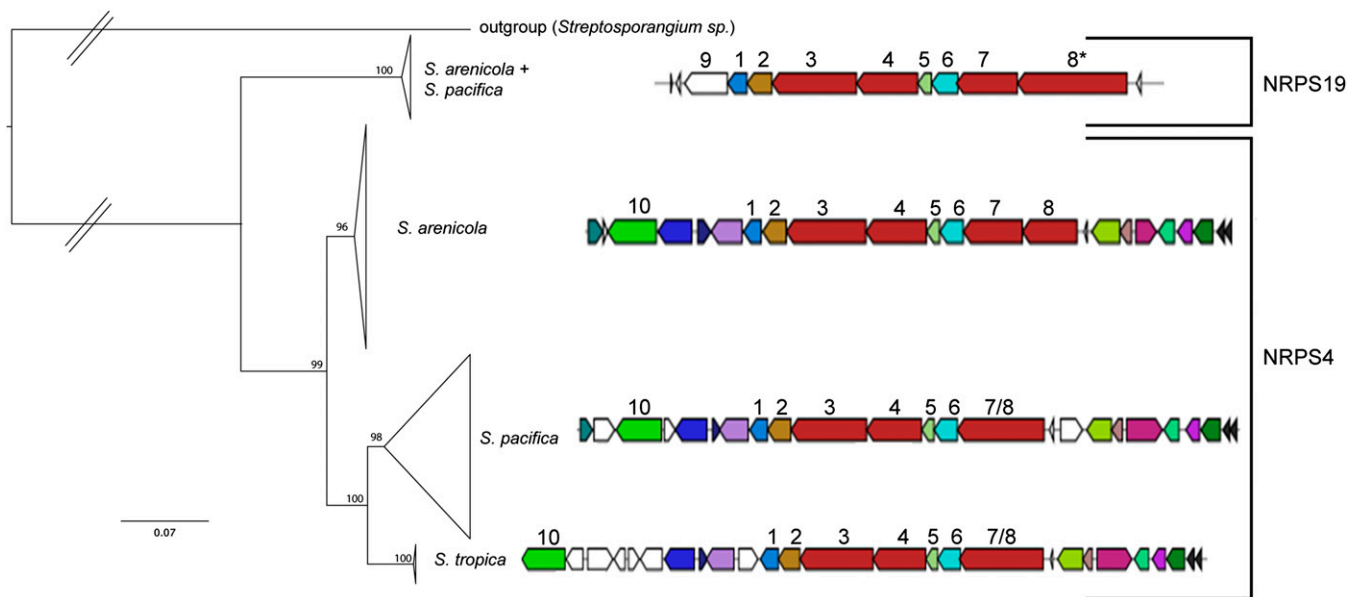

Fig. S2. Operational biosynthetic unit (OBU) phylogeny supports duplication followed by divergence. Nonribosomal peptide synthetase (NRPS)4 was detected in all but one of the 75 *Salinispora* strains. NRPS19 was placed in a separate OBU that shared ca. 80% homologous C-domain sequence identity with NRPS4. It possesses an additional C domain in the NRPS gene Orf8 and was observed in 16 *S. arenicola* and *S. pacifica* strains. Individual phylogenies of the NRPS genes orf3 and 4 and the kynurenine monooxygenase orf6 from these two pathways all revealed a sister relationship between the NRPS4 and NRPS19 clades, which can best be explained by a duplication event. The products of these pathways have yet to be identified. 1, methyltransferase; 2, major facilitator superfamily; 3, NRPS; 4, NRPS; 5, MbtH; 6, kynurenine-3-monooxygenase; 7, NRPS; 8, NRPS; 9, lantibiotic dehydratase; 10, penicillin amidase.

## OBU diversity

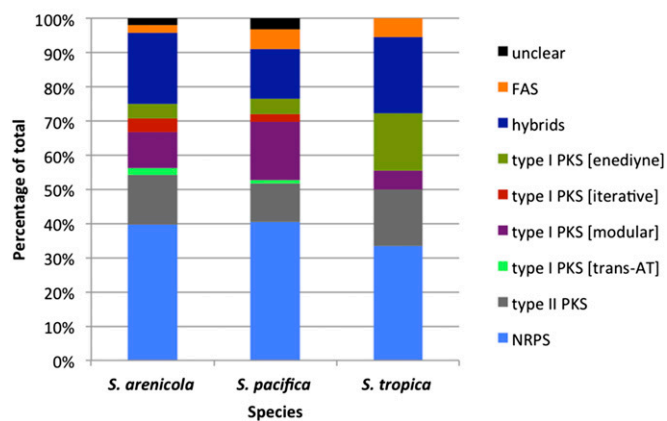

Fig. S3. Polyketide synthase (PKS) and NRPS relative abundance and NaDPos PKS classification (1). FAS, fatty acid synthase.

1. Ziemert N, et al. (2012) The natural product domain seeker NaDPos: A phylogeny based bioinformatic tool to classify secondary metabolite gene diversity. *PLoS ONE* 7(3):e34064.



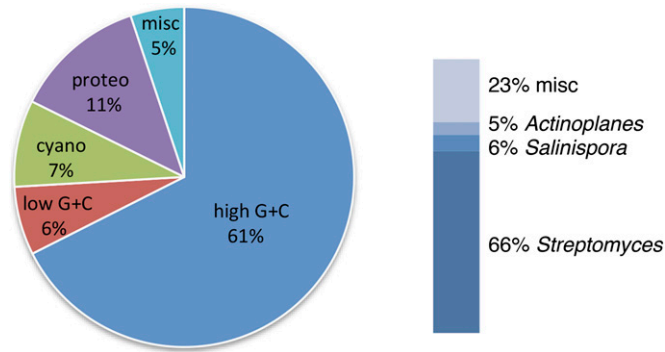

Fig. 55. Taxonomic assignments of top BLAST matches for OBUs observed in one strain (singletons). Cyano, cyanobacteria; proteo, proteobacteria.

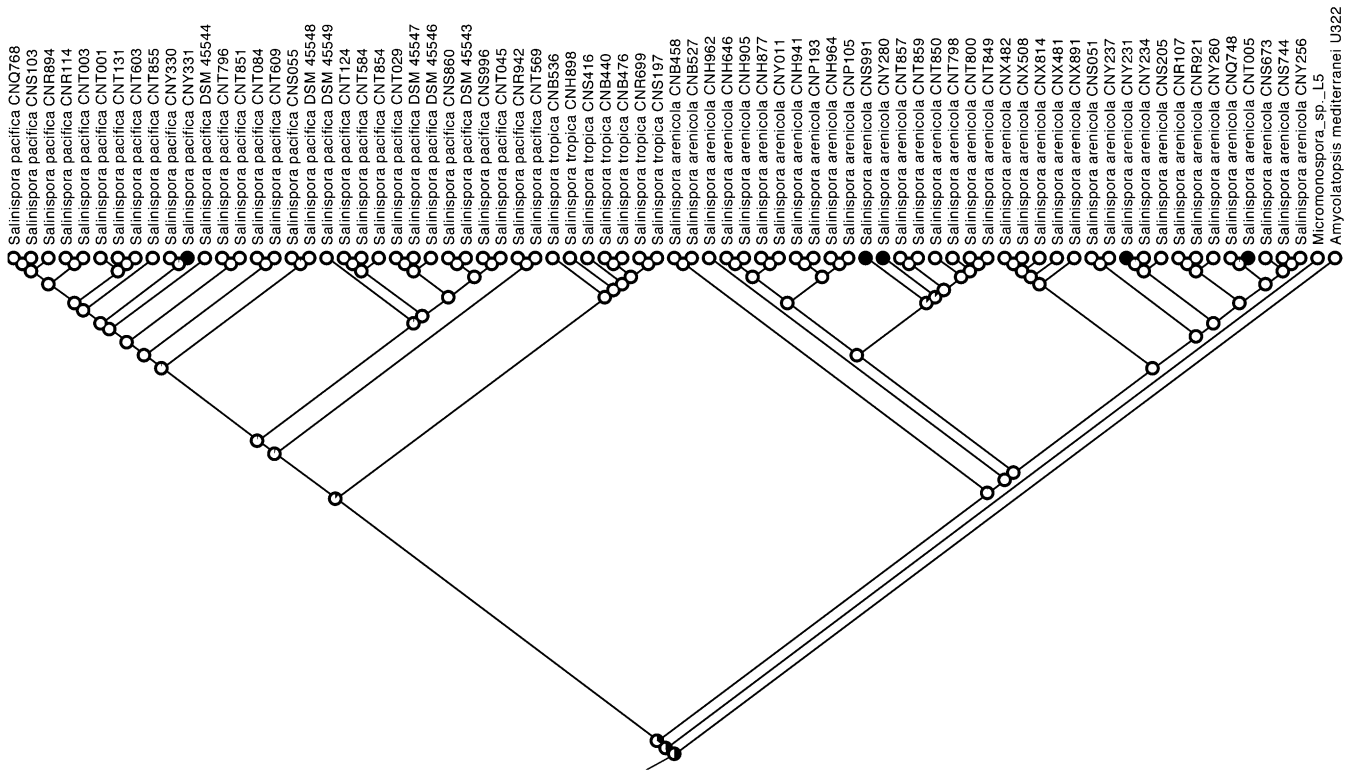

Fig. 56. Location-specific pathway acquisition. Likelihood analysis showing multiple ancestral nodes for PKS17 on the *Salinispora* species tree (black circles). This result was used to infer that the OBU had been acquired independently by four *S. arenicola* strains from Fiji (CNS-991, CNT-005, CNY-231, and CNY-280) and one *S. pacifica* strain from the Sea of Cortez (CNY-331).

**Table S1. *Salinispora* strains and sequence accession numbers**

| Species and strain           | IMG genome ID | NCBI taxon ID |
|------------------------------|---------------|---------------|
| <i>S. arenicola</i> CNB-458  | 2517572210    | 1136425       |
| <i>S. arenicola</i> CNB-527  | 2515154093    | 1137250       |
| <i>S. arenicola</i> CNH-646  | 2515154181    | 1136427       |
| <i>S. arenicola</i> CNH-877  | 2519103192    | 1169176       |
| <i>S. arenicola</i> CNH-905  | 2515154183    | 1137251       |
| <i>S. arenicola</i> CNH-941  | 2515154193    | 1137252       |
| <i>S. arenicola</i> CNH-962  | 2519103193    | 1169175       |
| <i>S. arenicola</i> CNH-964  | 2515154125    | 1136430       |
| <i>S. arenicola</i> CNP-105  | 2518285551    | 1169174       |
| <i>S. arenicola</i> CNP-193  | 2518285552    | 1169170       |
| <i>S. arenicola</i> CNQ-748  | 2515154180    | 1144929       |
| <i>S. arenicola</i> CNR-107  | 2519103194    | 1169167       |
| <i>S. arenicola</i> CNR-921  | 2515154203    | 1136429       |
| <i>S. arenicola</i> CNS-205  | 641228504     | 391037        |
| <i>S. arenicola</i> CNS-991  | 2516143022    | 999546        |
| <i>S. arenicola</i> CNS-051  | 2518285553    | 1169178       |
| <i>S. arenicola</i> CNS-673  | 2519103185    | 1144930       |
| <i>S. arenicola</i> CNS-744  | 2518285554    | 1169168       |
| <i>S. arenicola</i> CNT-005  | 2517572137    | 1137255       |
| <i>S. arenicola</i> CNT-798  | 2515154186    | 1137256       |
| <i>S. arenicola</i> CNT-800  | 2515154088    | 1137253       |
| <i>S. arenicola</i> CNT-850  | 2515154135    | 1136428       |
| <i>S. arenicola</i> CNT-857  | 2515154127    | 1137254       |
| <i>S. arenicola</i> CNT-859  | 2517572233    | 1169163       |
| <i>S. arenicola</i> CNX-481  | 2518285555    | 1169169       |
| <i>S. arenicola</i> CNX-482  | 2515154137    | 1136426       |
| <i>S. arenicola</i> CNX-508  | 2515154188    | 1137257       |
| <i>S. arenicola</i> CNX-814  | 2517572152    | 1169171       |
| <i>S. arenicola</i> CNX-891  | 2515154187    | 1137258       |
| <i>S. arenicola</i> CNY-011  | 2517572153    | 1169162       |
| <i>S. arenicola</i> CNY-231  | 2518285558    | 1169179       |
| <i>S. arenicola</i> CNY-234  | 2519103195    | 1169165       |
| <i>S. arenicola</i> CNY-256  | 2518285559    | 1169166       |
| <i>S. arenicola</i> CNY-260  | 2518285560    | 1169177       |
| <i>S. arenicola</i> CNY-280  | 2517572154    | 1169173       |
| <i>S. pacifica</i> CNQ-768   | 2517572155    | 1169193       |
| <i>S. pacifica</i> CNR-114   | 2515154178    | 1137260       |
| <i>S. pacifica</i> CNR-894   | 2515154194    | 1137261       |
| <i>S. pacifica</i> CNR-942   | 2518285561    | 1169187       |
| <i>S. pacifica</i> CNS-055   | 2518285562    | 1169182       |
| <i>S. pacifica</i> CNS-103   | 2515154129    | 1137262       |
| <i>S. pacifica</i> CNS-860   | 2518285563    | 1169186       |
| <i>S. pacifica</i> CNS-996   | 2517572157    | 1169189       |
| <i>S. pacifica</i> CNT-001   | 2515154184    | 1136416       |
| <i>S. pacifica</i> CNT-003   | 2515154126    | 1136417       |
| <i>S. pacifica</i> CNT-029   | 2515154177    | 1136418       |
| <i>S. pacifica</i> CNT-045   | 2517572158    | 1169190       |
| <i>S. pacifica</i> CNT-084   | 2515154202    | 1136419       |
| <i>S. pacifica</i> CNT-124   | 2517572159    | 1169188       |
| <i>S. pacifica</i> CNT-131   | 2515154200    | 1136420       |
| <i>S. pacifica</i> CNT-569   | 2515154124    | 1137263       |
| <i>S. pacifica</i> CNT-584   | 2517572160    | 1169191       |
| <i>S. pacifica</i> CNT-603   | 2515154185    | 1136424       |
| <i>S. pacifica</i> CNT-609   | 2517572161    | 1169184       |
| <i>S. pacifica</i> CNT-796   | 2515154182    | 1206102       |
| <i>S. pacifica</i> CNT-849   | 2518285550    | 1137264       |
| <i>S. pacifica</i> CNT-851   | 2517572162    | 1169180       |
| <i>S. pacifica</i> CNT-854   | 2515154170    | 1137265       |
| <i>S. pacifica</i> CNT-855   | 2515154128    | 1137266       |
| <i>S. pacifica</i> CNY-237   | 2517572163    | 1169185       |
| <i>S. pacifica</i> CNY-330   | 2518645626    | 1169192       |
| <i>S. pacifica</i> CNY-331   | 2518645627    | 1169181       |
| <i>S. pacifica</i> DSM-45543 | 2517572194    | 168694        |

**Table S1. Cont.**

| Species and strain           | IMG genome ID | NCBI taxon ID |
|------------------------------|---------------|---------------|
| <i>S. pacifica</i> DSM-45544 | 2517287019    | 999543        |
| <i>S. pacifica</i> DSM-45546 | 2516653042    | 1050198       |
| <i>S. pacifica</i> DSM-45547 | 2516493032    | 1050199       |
| <i>S. pacifica</i> DSM-45548 | 2517287023    | 999544        |
| <i>S. pacifica</i> DSM-45549 | 2517434008    | 999545        |
| <i>S. tropica</i> CNB-440    | 640427140     | 369723        |
| <i>S. tropica</i> CNB-476    | 2517572211    | 1137247       |
| <i>S. tropica</i> CNB-536    | 2517572212    | 1136431       |
| <i>S. tropica</i> CNH-898    | 2515154094    | 1137248       |
| <i>S. tropica</i> CNR-699    | 2518645624    | 1169198       |
| <i>S. tropica</i> CNS-197    | 2515154163    | 1137249       |
| <i>S. tropica</i> CNS-416    | 2517572164    | 1169195       |

IMG, Integrated Microbial Genomes database; NCBI, National Center for Biotechnology Information.



**Table S3. Pathway (OBU) distributions among *Salinispora tropica* strains**

| Pathway | Strain  |         |         |         |         |         |         |
|---------|---------|---------|---------|---------|---------|---------|---------|
|         | CNB-440 | CNB-476 | CNB-536 | CNH-898 | CNS-197 | CNS-416 | CNR-699 |
| PKS4    | 1       | 1       | 1       | 1       | 1       | 1       | 1       |
| FAS1    | 1       | 1       | 1       | 1       | 1       | 1       | 1       |
| NRPS4   | 1       | 1       | 1       | 1       | 1       | 1       | 1       |
| lym     | 1       | 1       | 1       | 1       | 1       | 1       | 1       |
| Sid1    | 1       | 1       | 1       | 1       | 1       | 1       | 1       |
| lom     | 1       | 1       | 1       | 1       | 1       | 1       | 1       |
| slm     | 1       | 1       | 1       | 1       | 1       | 1       | 1       |
| sal     | 1       | 1       | 1       | 1       | 1       | 1       | 1       |
| Sid3    | 1       | 1       | 1       | 1       | 1       | 1       | 1       |
| Sid4    | 1       | 1       | 1       | 1       | 1       | 1       | 1       |
| NRPS3   | 1       | 1       | 0       | 1       | 1       | 1       | 1       |
| spo     | 1       | 1       | 0       | 1       | 1       | 1       | 1       |
| STpks1  | 1       | 0       | 0       | 0       | 1       | 0       | 1       |
| FAS5    | 0       | 0       | 1       | 1       | 0       | 0       | 0       |
| NRPS36  | 0       | 0       | 1       | 1       | 0       | 0       | 0       |
| cya     | 0       | 0       | 1       | 0       | 0       | 0       | 0       |
| PKS41   | 0       | 0       | 1       | 0       | 0       | 0       | 0       |
| PKS42   | 0       | 0       | 0       | 1       | 0       | 0       | 0       |
| NRPS41  | 0       | 0       | 0       | 1       | 0       | 0       | 0       |



Table S4. Pathway (OBU) distributions among *Salinispora pacifica* strains

| Pathway | CNQ-768 | CNS-055 | CNR-114 | CNR-894 | CNR-942 | CNS-103 | CNS-860 | DSM45543 | DSM45544 | CNS-996 | CNT-001 | CNT-003 | CNT-029 | CNT-045 | CNT-084 | CNT-124 | CNT-131 | DSM45546 | DSM45547 | DSM45548 | DSM45549 | CNT-569 | CNT-584 | CNT-603 | CNT-609 | CNT-851 | CNT-854 | CNT-855 | CNT-796 | CNY-330 | CNY-331 |   |
|---------|---------|---------|---------|---------|---------|---------|---------|----------|----------|---------|---------|---------|---------|---------|---------|---------|---------|----------|----------|----------|----------|---------|---------|---------|---------|---------|---------|---------|---------|---------|---------|---|
| PKS4    | 1       | 1       | 1       | 1       | 1       | 1       | 1       | 1        | 1        | 1       | 1       | 1       | 1       | 1       | 1       | 1       | 1       | 1        | 1        | 1        | 1        | 1       | 1       | 1       | 1       | 1       | 1       | 1       | 1       | 1       | 1       |   |
| FAS1    | 1       | 1       | 1       | 1       | 1       | 1       | 1       | 1        | 1        | 1       | 1       | 1       | 1       | 1       | 1       | 1       | 1       | 1        | 1        | 1        | 1        | 1       | 1       | 1       | 1       | 1       | 1       | 1       | 1       | 1       | 1       | 1 |
| NRPS4   | 1       | 1       | 1       | 1       | 1       | 1       | 1       | 1        | 1        | 1       | 1       | 1       | 1       | 1       | 1       | 1       | 1       | 1        | 1        | 1        | 1        | 1       | 1       | 1       | 1       | 1       | 1       | 1       | 1       | 1       | 1       | 1 |
| cya     | 1       | 0       | 1       | 0       | 1       | 1       | 1       | 1        | 1        | 1       | 1       | 1       | 1       | 1       | 0       | 1       | 1       | 1        | 1        | 1        | 1        | 1       | 0       | 1       | 1       | 0       | 1       | 1       | 1       | 1       | 1       | 1 |
| lym     | 1       | 1       | 1       | 1       | 1       | 1       | 1       | 1        | 1        | 1       | 1       | 1       | 1       | 1       | 0       | 1       | 1       | 1        | 1        | 1        | 1        | 1       | 1       | 1       | 1       | 1       | 1       | 1       | 1       | 1       | 1       | 1 |
| lom     | 1       | 1       | 1       | 1       | 1       | 1       | 1       | 1        | 1        | 1       | 1       | 1       | 1       | 1       | 0       | 1       | 1       | 1        | 1        | 1        | 1        | 1       | 1       | 1       | 1       | 1       | 1       | 1       | 1       | 1       | 1       | 1 |
| NRPS20  | 0       | 1       | 0       | 0       | 1       | 1       | 1       | 1        | 1        | 1       | 1       | 1       | 1       | 1       | 0       | 1       | 1       | 1        | 1        | 1        | 1        | 1       | 1       | 1       | 1       | 1       | 1       | 1       | 1       | 1       | 1       | 1 |
| PKS16   | 1       | 1       | 1       | 1       | 1       | 1       | 1       | 1        | 1        | 1       | 1       | 1       | 1       | 1       | 0       | 1       | 1       | 1        | 1        | 1        | 1        | 1       | 1       | 1       | 1       | 1       | 1       | 1       | 1       | 1       | 1       | 1 |
| slm     | 1       | 1       | 1       | 1       | 1       | 1       | 1       | 1        | 1        | 1       | 1       | 1       | 1       | 1       | 0       | 1       | 1       | 1        | 1        | 1        | 1        | 1       | 1       | 1       | 1       | 1       | 1       | 1       | 1       | 1       | 1       | 1 |
| PKS19   | 1       | 1       | 1       | 1       | 1       | 1       | 1       | 1        | 1        | 1       | 1       | 1       | 1       | 1       | 0       | 1       | 1       | 1        | 1        | 1        | 1        | 1       | 1       | 1       | 1       | 1       | 1       | 1       | 1       | 1       | 1       | 1 |
| NRPS16  | 1       | 0       | 1       | 1       | 0       | 1       | 0       | 1        | 1        | 1       | 1       | 1       | 1       | 1       | 0       | 1       | 1       | 1        | 1        | 1        | 1        | 1       | 1       | 1       | 1       | 1       | 1       | 1       | 1       | 1       | 1       | 1 |
| NRPS19  | 1       | 0       | 1       | 1       | 0       | 1       | 0       | 1        | 1        | 1       | 1       | 1       | 1       | 1       | 0       | 1       | 1       | 1        | 1        | 1        | 1        | 1       | 1       | 1       | 1       | 1       | 1       | 1       | 1       | 1       | 1       | 1 |
| PKS25   | 0       | 0       | 0       | 0       | 0       | 1       | 1       | 0        | 1        | 1       | 1       | 1       | 1       | 1       | 0       | 1       | 1       | 1        | 1        | 1        | 1        | 1       | 1       | 1       | 1       | 1       | 1       | 1       | 1       | 1       | 1       | 1 |
| NRPS28  | 0       | 0       | 0       | 0       | 0       | 0       | 0       | 1        | 1        | 1       | 1       | 1       | 1       | 1       | 0       | 1       | 1       | 1        | 1        | 1        | 1        | 1       | 1       | 1       | 1       | 1       | 1       | 1       | 1       | 1       | 1       | 1 |
| NRPS1   | 0       | 1       | 0       | 0       | 0       | 1       | 1       | 0        | 1        | 1       | 1       | 1       | 1       | 1       | 0       | 1       | 1       | 1        | 1        | 1        | 1        | 1       | 1       | 1       | 1       | 1       | 1       | 1       | 1       | 1       | 1       | 1 |
| sal     | 0       | 0       | 0       | 0       | 1       | 1       | 1       | 1        | 1        | 1       | 1       | 1       | 1       | 1       | 0       | 1       | 1       | 1        | 1        | 1        | 1        | 1       | 1       | 1       | 1       | 1       | 1       | 1       | 1       | 1       | 1       | 1 |
| SID1    | 0       | 0       | 0       | 0       | 1       | 1       | 1       | 1        | 1        | 1       | 1       | 1       | 1       | 1       | 0       | 1       | 1       | 1        | 1        | 1        | 1        | 1       | 1       | 1       | 1       | 1       | 1       | 1       | 1       | 1       | 1       | 1 |
| NRPS27  | 0       | 0       | 0       | 0       | 1       | 1       | 1       | 1        | 1        | 1       | 1       | 1       | 1       | 1       | 0       | 1       | 1       | 1        | 1        | 1        | 1        | 1       | 1       | 1       | 1       | 1       | 1       | 1       | 1       | 1       | 1       | 1 |
| PKS12   | 1       | 0       | 0       | 1       | 0       | 0       | 1       | 1        | 1        | 1       | 1       | 1       | 1       | 1       | 0       | 1       | 1       | 1        | 1        | 1        | 1        | 1       | 1       | 1       | 1       | 1       | 1       | 1       | 1       | 1       | 1       | 1 |
| FAS3    | 0       | 0       | 0       | 0       | 0       | 0       | 0       | 1        | 1        | 1       | 1       | 1       | 1       | 1       | 0       | 1       | 1       | 1        | 1        | 1        | 1        | 1       | 1       | 1       | 1       | 1       | 1       | 1       | 1       | 1       | 1       | 1 |
| NRPS43  | 0       | 0       | 0       | 0       | 0       | 0       | 0       | 1        | 1        | 1       | 1       | 1       | 1       | 1       | 0       | 1       | 1       | 1        | 1        | 1        | 1        | 1       | 1       | 1       | 1       | 1       | 1       | 1       | 1       | 1       | 1       | 1 |
| PKS44   | 0       | 0       | 0       | 0       | 1       | 1       | 1       | 1        | 1        | 1       | 1       | 1       | 1       | 1       | 0       | 1       | 1       | 1        | 1        | 1        | 1        | 1       | 1       | 1       | 1       | 1       | 1       | 1       | 1       | 1       | 1       | 1 |
| NRPS21  | 0       | 0       | 0       | 1       | 0       | 0       | 0       | 1        | 1        | 1       | 1       | 1       | 1       | 1       | 0       | 1       | 1       | 1        | 1        | 1        | 1        | 1       | 1       | 1       | 1       | 1       | 1       | 1       | 1       | 1       | 1       | 1 |
| NRPS22  | 0       | 0       | 0       | 1       | 0       | 0       | 0       | 1        | 1        | 1       | 1       | 1       | 1       | 1       | 0       | 1       | 1       | 1        | 1        | 1        | 1        | 1       | 1       | 1       | 1       | 1       | 1       | 1       | 1       | 1       | 1       | 1 |
| NRPS42  | 0       | 0       | 0       | 0       | 0       | 1       | 1       | 1        | 1        | 1       | 1       | 1       | 1       | 1       | 0       | 1       | 1       | 1        | 1        | 1        | 1        | 1       | 1       | 1       | 1       | 1       | 1       | 1       | 1       | 1       | 1       | 1 |
| SID3    | 0       | 1       | 0       | 0       | 1       | 0       | 0       | 1        | 1        | 1       | 1       | 1       | 1       | 1       | 0       | 1       | 1       | 1        | 1        | 1        | 1        | 1       | 1       | 1       | 1       | 1       | 1       | 1       | 1       | 1       | 1       | 1 |
| SID4    | 0       | 1       | 0       | 0       | 1       | 0       | 0       | 1        | 1        | 1       | 1       | 1       | 1       | 1       | 0       | 1       | 1       | 1        | 1        | 1        | 1        | 1       | 1       | 1       | 1       | 1       | 1       | 1       | 1       | 1       | 1       | 1 |
| PKS9    | 0       | 0       | 0       | 0       | 0       | 1       | 1       | 1        | 1        | 1       | 1       | 1       | 1       | 1       | 0       | 1       | 1       | 1        | 1        | 1        | 1        | 1       | 1       | 1       | 1       | 1       | 1       | 1       | 1       | 1       | 1       | 1 |
| PKS31   | 0       | 0       | 0       | 0       | 0       | 0       | 0       | 1        | 1        | 1       | 1       | 1       | 1       | 1       | 0       | 1       | 1       | 1        | 1        | 1        | 1        | 1       | 1       | 1       | 1       | 1       | 1       | 1       | 1       | 1       | 1       | 1 |
| NRPS10  | 0       | 0       | 0       | 0       | 0       | 0       | 0       | 1        | 1        | 1       | 1       | 1       | 1       | 1       | 0       | 1       | 1       | 1        | 1        | 1        | 1        | 1       | 1       | 1       | 1       | 1       | 1       | 1       | 1       | 1       | 1       | 1 |
| NRPS37  | 0       | 0       | 0       | 0       | 0       | 0       | 0       | 1        | 1        | 1       | 1       | 1       | 1       | 1       | 0       | 1       | 1       | 1        | 1        | 1        | 1        | 1       | 1       | 1       | 1       | 1       | 1       | 1       | 1       | 1       | 1       | 1 |
| PKS2    | 0       | 0       | 0       | 0       | 1       | 0       | 0       | 0        | 0        | 0       | 0       | 0       | 0       | 0       | 0       | 0       | 0       | 0        | 0        | 0        | 0        | 0       | 0       | 0       | 0       | 0       | 0       | 0       | 0       | 0       | 0       | 0 |
| NRPS3   | 0       | 0       | 0       | 0       | 1       | 0       | 0       | 0        | 0        | 0       | 0       | 0       | 0       | 0       | 0       | 0       | 0       | 0        | 0        | 0        | 0        | 0       | 0       | 0       | 0       | 0       | 0       | 0       | 0       | 0       | 0       | 0 |
| spo     | 0       | 0       | 0       | 0       | 0       | 0       | 0       | 0        | 0        | 0       | 0       | 0       | 0       | 0       | 1       | 1       | 1       | 1        | 1        | 1        | 1        | 1       | 1       | 1       | 1       | 1       | 1       | 1       | 1       | 1       | 1       | 1 |
| STPKS1  | 0       | 0       | 0       | 0       | 0       | 0       | 0       | 0        | 0        | 0       | 0       | 0       | 0       | 0       | 0       | 0       | 0       | 0        | 0        | 0        | 0        | 0       | 0       | 0       | 0       | 0       | 0       | 0       | 0       | 0       | 0       | 0 |
| PKS28   | 0       | 0       | 0       | 0       | 0       | 0       | 0       | 0        | 0        | 0       | 0       | 0       | 0       | 0       | 0       | 0       | 0       | 0        | 1        | 1        | 1        | 1       | 1       | 1       | 1       | 1       | 1       | 1       | 1       | 1       | 1       | 1 |
| PKS10   | 0       | 0       | 0       | 0       | 0       | 1       | 0       | 0        | 0        | 1       | 1       | 1       | 1       | 1       | 0       | 0       | 0       | 0        | 0        | 0        | 0        | 0       | 0       | 0       | 0       | 0       | 0       | 0       | 0       | 0       | 0       | 0 |
| PKS20   | 0       | 0       | 0       | 0       | 0       | 0       | 0       | 0        | 1        | 1       | 1       | 1       | 1       | 1       | 0       | 0       | 0       | 0        | 0        | 0        | 0        | 0       | 0       | 0       | 0       | 0       | 0       | 0       | 0       | 0       | 0       | 0 |
| FAS2    | 0       | 0       | 0       | 0       | 0       | 1       | 0       | 0        | 0        | 0       | 0       | 0       | 0       | 0       | 0       | 0       | 0       | 0        | 0        | 0        | 0        | 0       | 0       | 0       | 0       | 0       | 0       | 0       | 0       | 0       | 0       | 0 |
| PKS22   | 0       | 0       | 1       | 0       | 0       | 0       | 0       | 0        | 0        | 0       | 0       | 0       | 0       | 0       | 0       | 0       | 0       | 0        | 0        | 0        | 0        | 0       | 0       | 0       | 0       | 0       | 0       | 0       | 0       | 0       | 0       | 0 |
| PKS24   | 0       | 0       | 0       | 0       | 0       | 0       | 0       | 0        | 0        | 0       | 0       | 0       | 0       | 0       | 0       | 0       | 0       | 0        | 0        | 0        | 0        | 0       | 0       | 0       | 0       | 0       | 0       | 0       | 0       | 0       | 0       | 0 |
| PKS26   | 0       | 0       | 0       | 0       | 0       | 0       | 0       | 0        | 0        | 0       | 0       | 0       | 0       | 0       | 1       | 1       | 1       | 1        | 1        | 1        | 1        | 1       | 1       | 1       | 1       | 1       | 1       | 1       | 1       | 1       | 1       | 1 |
| PKS27   | 0       | 0       | 0       | 0       | 0       | 0       | 0       | 0        | 0        | 0       | 0       | 0       | 0       | 0       | 0       | 0       | 0       | 0        | 0        | 0        | 0        | 0       | 0       | 0       | 0       | 0       | 0       | 0       | 0       | 0       | 0       | 0 |
| PKS32   | 0       | 0       | 0       | 0       | 1       | 0       | 0       | 0        | 0        | 0       | 0       | 0       | 0       | 0       | 0       | 0       | 0       | 0        | 0        | 0        | 0        | 0       | 0       | 0       | 0       | 0       | 0       | 0       | 0       | 0       | 0       | 0 |
| PKS33   | 0       | 0       | 0       | 0       | 1       | 0       | 0       | 0        | 0        | 0       | 0       | 0       | 0       | 0       | 0       | 0       | 0       | 0        | 0        | 0        | 0        | 0       | 0       | 0       | 0       | 0       | 0       | 0       | 0       | 0       | 0       | 0 |

Strain

Table S4. Cont.

| Pathway  | Strain |   |   |   |   |   |   |   |   |   |   |   |   |   |   |   |   |   |   |   |   |   |   |   |   |   |   |   |   |   |   |   |   |   |   |   |   |   |   |   |   |   |   |   |   |   |   |   |   |   |
|----------|--------|---|---|---|---|---|---|---|---|---|---|---|---|---|---|---|---|---|---|---|---|---|---|---|---|---|---|---|---|---|---|---|---|---|---|---|---|---|---|---|---|---|---|---|---|---|---|---|---|---|
| CNQ-768  | 0      | 0 | 0 | 0 | 0 | 0 | 0 | 0 | 0 | 0 | 0 | 0 | 0 | 0 | 0 | 0 | 0 | 0 | 0 | 0 | 0 | 0 | 0 | 0 | 0 | 0 | 0 | 0 | 0 | 0 | 0 | 0 | 0 | 0 | 0 | 0 | 0 |   |   |   |   |   |   |   |   |   |   |   |   |   |
| CNS-055  | 0      | 0 | 0 | 0 | 0 | 0 | 0 | 0 | 0 | 0 | 0 | 0 | 0 | 0 | 0 | 0 | 0 | 0 | 0 | 0 | 0 | 0 | 0 | 0 | 0 | 0 | 0 | 0 | 0 | 0 | 0 | 0 | 0 | 0 | 0 | 0 | 0 | 0 |   |   |   |   |   |   |   |   |   |   |   |   |
| CNR-114  | 0      | 0 | 0 | 0 | 0 | 0 | 0 | 0 | 0 | 0 | 0 | 0 | 0 | 0 | 0 | 0 | 0 | 0 | 0 | 0 | 0 | 0 | 0 | 0 | 0 | 0 | 0 | 0 | 0 | 0 | 0 | 0 | 0 | 0 | 0 | 0 | 0 | 1 | 0 |   |   |   |   |   |   |   |   |   |   |   |
| CNR-894  | 0      | 0 | 0 | 0 | 0 | 0 | 0 | 0 | 0 | 0 | 0 | 0 | 0 | 0 | 0 | 0 | 0 | 0 | 0 | 0 | 0 | 0 | 0 | 0 | 0 | 0 | 0 | 0 | 0 | 0 | 0 | 0 | 0 | 0 | 0 | 0 | 0 | 0 | 0 | 0 |   |   |   |   |   |   |   |   |   |   |
| CNR-942  | 1      | 0 | 0 | 0 | 0 | 0 | 0 | 0 | 0 | 0 | 0 | 0 | 0 | 0 | 0 | 0 | 0 | 0 | 0 | 0 | 0 | 0 | 0 | 0 | 0 | 0 | 0 | 0 | 0 | 0 | 0 | 0 | 0 | 0 | 0 | 0 | 0 | 0 | 0 | 0 |   |   |   |   |   |   |   |   |   |   |
| CNS-103  | 0      | 0 | 0 | 0 | 0 | 0 | 0 | 0 | 0 | 0 | 0 | 0 | 0 | 0 | 0 | 0 | 0 | 0 | 0 | 0 | 0 | 0 | 0 | 0 | 0 | 0 | 0 | 0 | 0 | 0 | 0 | 0 | 0 | 0 | 0 | 0 | 0 | 0 | 0 | 0 | 0 |   |   |   |   |   |   |   |   |   |
| CNS-860  | 0      | 0 | 0 | 0 | 0 | 0 | 0 | 0 | 0 | 0 | 0 | 0 | 0 | 0 | 0 | 0 | 0 | 0 | 0 | 0 | 0 | 0 | 0 | 0 | 0 | 0 | 0 | 0 | 0 | 0 | 0 | 0 | 0 | 0 | 0 | 0 | 0 | 0 | 0 | 0 | 0 | 0 |   |   |   |   |   |   |   |   |
| DSM45543 | 0      | 0 | 0 | 0 | 0 | 0 | 0 | 0 | 0 | 0 | 0 | 0 | 0 | 0 | 0 | 0 | 0 | 0 | 0 | 0 | 0 | 0 | 0 | 0 | 0 | 0 | 0 | 0 | 0 | 0 | 0 | 0 | 0 | 0 | 0 | 0 | 0 | 0 | 0 | 0 | 0 | 0 |   |   |   |   |   |   |   |   |
| DSM45544 | 0      | 0 | 0 | 0 | 0 | 0 | 0 | 0 | 0 | 0 | 0 | 0 | 0 | 0 | 0 | 0 | 0 | 0 | 0 | 0 | 0 | 0 | 0 | 0 | 0 | 0 | 0 | 0 | 0 | 0 | 0 | 0 | 0 | 0 | 0 | 0 | 0 | 0 | 0 | 0 | 0 | 0 | 0 |   |   |   |   |   |   |   |
| CNS-996  | 0      | 0 | 0 | 0 | 0 | 0 | 0 | 0 | 0 | 0 | 0 | 0 | 0 | 0 | 0 | 0 | 0 | 0 | 0 | 0 | 0 | 0 | 0 | 0 | 0 | 0 | 0 | 0 | 0 | 0 | 0 | 0 | 0 | 0 | 0 | 0 | 0 | 0 | 0 | 0 | 0 | 0 | 0 | 0 |   |   |   |   |   |   |
| CNT-001  | 0      | 0 | 0 | 0 | 0 | 0 | 0 | 0 | 0 | 0 | 0 | 0 | 0 | 0 | 0 | 0 | 0 | 0 | 0 | 0 | 0 | 0 | 0 | 0 | 0 | 0 | 0 | 0 | 0 | 0 | 0 | 0 | 0 | 0 | 0 | 0 | 0 | 0 | 0 | 0 | 0 | 0 | 0 | 0 | 0 |   |   |   |   |   |
| CNT-003  | 0      | 0 | 0 | 0 | 0 | 0 | 0 | 0 | 0 | 0 | 0 | 0 | 0 | 0 | 0 | 0 | 0 | 0 | 0 | 0 | 0 | 0 | 0 | 0 | 0 | 0 | 0 | 0 | 0 | 0 | 0 | 0 | 0 | 0 | 0 | 0 | 0 | 0 | 0 | 0 | 0 | 0 | 0 | 0 | 0 | 0 |   |   |   |   |
| CNT-029  | 0      | 0 | 0 | 0 | 0 | 0 | 0 | 0 | 0 | 0 | 0 | 0 | 0 | 0 | 0 | 0 | 0 | 0 | 0 | 0 | 0 | 0 | 0 | 0 | 0 | 0 | 0 | 0 | 0 | 0 | 0 | 0 | 0 | 0 | 0 | 0 | 0 | 0 | 0 | 0 | 0 | 0 | 0 | 0 | 0 | 0 | 0 |   |   |   |
| CNT-045  | 0      | 0 | 0 | 0 | 0 | 0 | 0 | 0 | 0 | 0 | 0 | 0 | 0 | 0 | 0 | 0 | 0 | 0 | 0 | 0 | 0 | 0 | 0 | 0 | 0 | 0 | 0 | 0 | 0 | 0 | 0 | 0 | 0 | 0 | 0 | 0 | 0 | 0 | 0 | 0 | 0 | 0 | 0 | 0 | 0 | 0 | 0 |   |   |   |
| CNT-084  | 0      | 0 | 0 | 0 | 0 | 0 | 0 | 0 | 0 | 0 | 0 | 0 | 0 | 0 | 0 | 0 | 0 | 0 | 0 | 0 | 0 | 0 | 0 | 0 | 0 | 0 | 0 | 0 | 0 | 0 | 0 | 0 | 0 | 0 | 0 | 0 | 0 | 0 | 0 | 0 | 0 | 0 | 0 | 0 | 0 | 0 | 0 | 0 |   |   |
| CNT-124  | 0      | 0 | 0 | 0 | 0 | 0 | 0 | 0 | 0 | 0 | 0 | 0 | 0 | 0 | 0 | 0 | 0 | 0 | 0 | 0 | 0 | 0 | 0 | 0 | 0 | 0 | 0 | 0 | 0 | 0 | 0 | 0 | 0 | 0 | 0 | 0 | 0 | 0 | 0 | 0 | 0 | 0 | 0 | 0 | 0 | 0 | 0 | 0 | 0 |   |
| CNT-131  | 0      | 0 | 0 | 0 | 0 | 0 | 0 | 0 | 0 | 0 | 0 | 0 | 0 | 0 | 0 | 0 | 0 | 0 | 0 | 0 | 0 | 0 | 0 | 0 | 0 | 0 | 0 | 0 | 0 | 0 | 0 | 0 | 0 | 0 | 0 | 0 | 0 | 0 | 0 | 0 | 0 | 0 | 0 | 0 | 0 | 0 | 0 | 0 | 0 |   |
| DSM45546 | 0      | 0 | 0 | 0 | 0 | 0 | 0 | 0 | 0 | 0 | 0 | 0 | 0 | 0 | 0 | 0 | 0 | 0 | 0 | 0 | 0 | 0 | 0 | 0 | 0 | 0 | 0 | 0 | 0 | 0 | 0 | 0 | 0 | 0 | 0 | 0 | 0 | 0 | 0 | 0 | 0 | 0 | 0 | 0 | 0 | 0 | 0 | 0 | 0 |   |
| DSM45547 | 0      | 0 | 0 | 0 | 0 | 0 | 0 | 0 | 0 | 0 | 0 | 0 | 0 | 0 | 0 | 0 | 0 | 0 | 0 | 0 | 0 | 0 | 0 | 0 | 0 | 0 | 0 | 0 | 0 | 0 | 0 | 0 | 0 | 0 | 0 | 0 | 0 | 0 | 0 | 0 | 0 | 0 | 0 | 0 | 0 | 0 | 0 | 0 | 0 |   |
| DSM45548 | 0      | 0 | 0 | 0 | 0 | 0 | 0 | 0 | 0 | 0 | 0 | 0 | 0 | 0 | 0 | 0 | 0 | 0 | 0 | 0 | 0 | 0 | 0 | 0 | 0 | 0 | 0 | 0 | 0 | 0 | 0 | 0 | 0 | 0 | 0 | 0 | 0 | 0 | 0 | 0 | 0 | 0 | 0 | 0 | 0 | 0 | 0 | 0 | 0 |   |
| DSM45549 | 0      | 0 | 0 | 0 | 0 | 0 | 0 | 0 | 0 | 0 | 0 | 0 | 0 | 0 | 0 | 0 | 0 | 0 | 0 | 0 | 0 | 0 | 0 | 0 | 0 | 0 | 0 | 0 | 0 | 0 | 0 | 0 | 0 | 0 | 0 | 0 | 0 | 0 | 0 | 0 | 0 | 0 | 0 | 0 | 0 | 0 | 0 | 0 | 0 |   |
| CNT-569  | 1      | 0 | 0 | 0 | 0 | 0 | 0 | 0 | 0 | 0 | 0 | 0 | 0 | 0 | 0 | 0 | 0 | 0 | 0 | 0 | 0 | 0 | 0 | 0 | 0 | 0 | 0 | 0 | 0 | 0 | 0 | 0 | 0 | 0 | 0 | 0 | 0 | 0 | 0 | 0 | 0 | 0 | 0 | 0 | 0 | 0 | 0 | 0 | 0 |   |
| CNT-584  | 0      | 0 | 0 | 0 | 0 | 0 | 0 | 0 | 0 | 0 | 0 | 0 | 0 | 0 | 0 | 0 | 0 | 0 | 0 | 0 | 0 | 0 | 0 | 0 | 0 | 0 | 0 | 0 | 0 | 0 | 0 | 0 | 0 | 0 | 0 | 0 | 0 | 0 | 0 | 0 | 0 | 0 | 0 | 0 | 0 | 0 | 0 | 0 | 0 |   |
| CNT-603  | 0      | 0 | 0 | 0 | 0 | 0 | 0 | 0 | 0 | 0 | 0 | 0 | 0 | 0 | 0 | 0 | 0 | 0 | 0 | 0 | 0 | 0 | 0 | 0 | 0 | 0 | 0 | 0 | 0 | 0 | 0 | 0 | 0 | 0 | 0 | 0 | 0 | 0 | 0 | 0 | 0 | 0 | 0 | 0 | 0 | 0 | 0 | 0 | 0 |   |
| CNT-609  | 0      | 0 | 0 | 0 | 0 | 0 | 0 | 0 | 0 | 0 | 0 | 0 | 0 | 0 | 0 | 0 | 0 | 0 | 0 | 0 | 0 | 0 | 0 | 0 | 0 | 0 | 0 | 0 | 0 | 0 | 0 | 0 | 0 | 0 | 0 | 0 | 0 | 0 | 0 | 0 | 0 | 0 | 0 | 0 | 0 | 0 | 0 | 0 | 0 |   |
| CNT-851  | 0      | 0 | 0 | 0 | 0 | 0 | 0 | 0 | 0 | 0 | 0 | 0 | 0 | 0 | 0 | 0 | 0 | 0 | 0 | 0 | 0 | 0 | 0 | 0 | 0 | 0 | 0 | 0 | 0 | 0 | 0 | 0 | 0 | 0 | 0 | 0 | 0 | 0 | 0 | 0 | 0 | 0 | 0 | 0 | 0 | 0 | 0 | 0 | 0 |   |
| CNT-854  | 0      | 0 | 0 | 0 | 0 | 0 | 0 | 0 | 0 | 0 | 0 | 0 | 0 | 0 | 0 | 0 | 0 | 0 | 0 | 0 | 0 | 0 | 0 | 0 | 0 | 0 | 0 | 0 | 0 | 0 | 0 | 0 | 0 | 0 | 0 | 0 | 0 | 0 | 0 | 0 | 0 | 0 | 0 | 0 | 0 | 0 | 0 | 0 | 0 |   |
| CNT-855  | 0      | 0 | 0 | 0 | 0 | 0 | 0 | 0 | 0 | 0 | 0 | 0 | 0 | 0 | 0 | 0 | 0 | 0 | 0 | 0 | 0 | 0 | 0 | 0 | 0 | 0 | 0 | 0 | 0 | 0 | 0 | 0 | 0 | 0 | 0 | 0 | 0 | 0 | 0 | 0 | 0 | 0 | 0 | 0 | 0 | 0 | 0 | 0 | 0 | 0 |
| CNT-796  | 0      | 0 | 0 | 0 | 0 | 0 | 0 | 0 | 0 | 0 | 0 | 0 | 0 | 0 | 0 | 0 | 0 | 0 | 0 | 0 | 0 | 0 | 0 | 0 | 0 | 0 | 0 | 0 | 0 | 0 | 0 | 0 | 0 | 0 | 0 | 0 | 0 | 0 | 0 | 0 | 0 | 0 | 0 | 0 | 0 | 0 | 0 | 0 | 0 | 0 |
| CNY-330  | 0      | 0 | 0 | 0 | 0 | 0 | 0 | 0 | 0 | 0 | 0 | 0 | 0 | 0 | 0 | 0 | 0 | 0 | 0 | 0 | 0 | 0 | 0 | 0 | 0 | 0 | 0 | 0 | 0 | 0 | 0 | 0 | 0 | 0 | 0 | 0 | 0 | 0 | 0 | 0 | 0 | 0 | 0 | 0 | 0 | 0 | 0 | 0 | 0 |   |
| CNY-331  | 0      | 0 | 0 | 0 | 0 | 0 | 0 | 0 | 0 | 0 | 0 | 0 | 0 | 0 | 0 | 0 | 0 | 0 | 0 | 0 | 0 | 0 | 0 | 0 | 0 | 0 | 0 | 0 | 0 | 0 | 0 | 0 | 0 | 0 | 0 | 0 | 0 | 0 | 0 | 0 | 0 | 0 | 0 | 0 | 0 | 0 | 0 | 0 | 0 | 0 |
